# Supplementary material for: Complete Genome Sequence of vB_EcoP_SU7, a Podoviridae Coliphage with the Rare C3 Morphotype
Source: Microorganisms. 2021 Jul 24;9(8):1576. doi: 10.3390/microorganisms9081576 (PMC8399022; doi:10.3390/microorganisms9081576)
Supplement: Supplementary file 1 [file microorganisms-09-01576-s001.zip › microorganisms-1280630-supplementary.pdf]

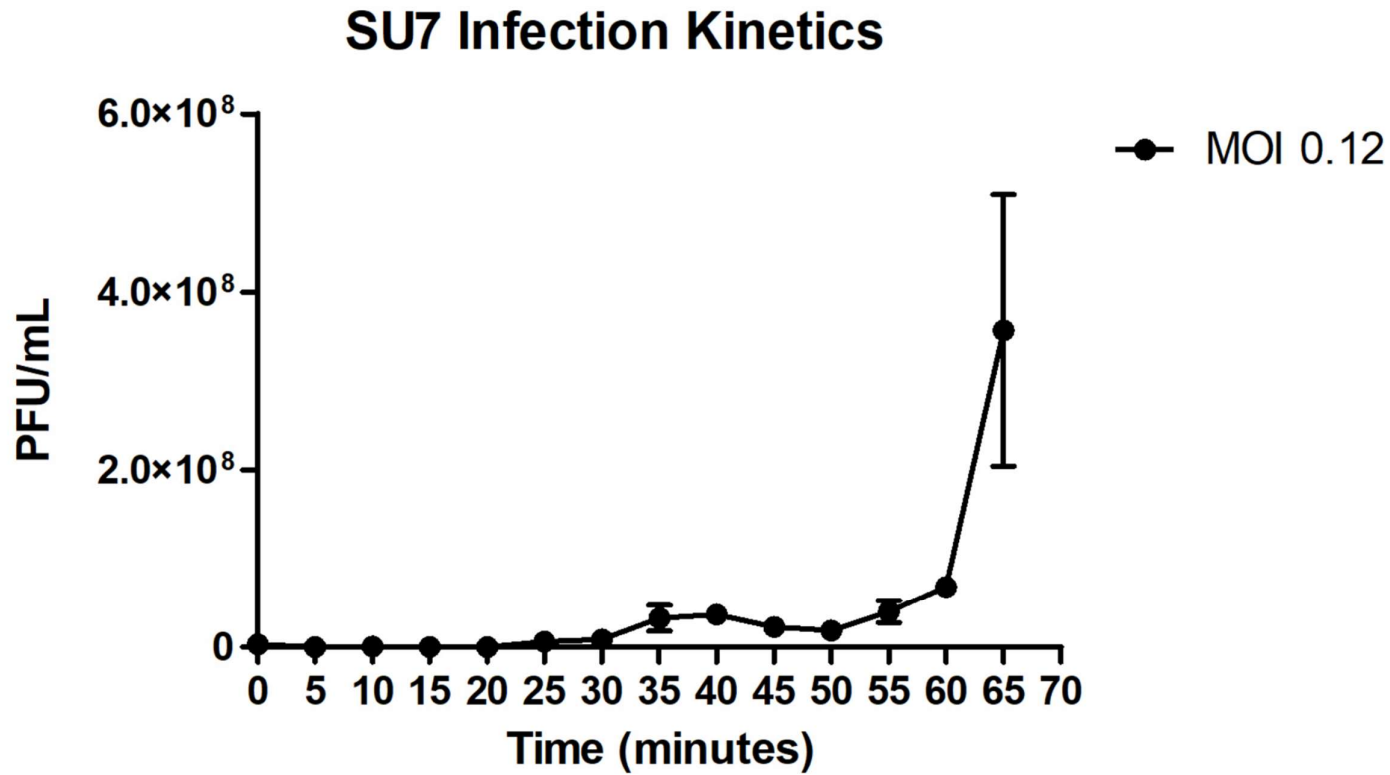

**Figure S1. One step growth curve of SU7 over an experimental duration of 65 minutes.** Presented is the infection kinetics of SU7 following two rounds of infection. SU7 has a latency period of 30 minutes (depicted as the first rise in phage titer and at 60 minutes) and a burst size of 12 PFU/cell. The adsorption rate constant five minutes post infection is  $8.78 \times 10^{-9}$  mL/min. Data points represent the average of three independent experiments and the error bars represent the standard error.

|         |         |         |         |         |         |         |         |         |            |         |         |
|---------|---------|---------|---------|---------|---------|---------|---------|---------|------------|---------|---------|
| ECOR-01 | ECOR-02 | ECOR-03 | ECOR-04 | ECOR-05 | ECOR-06 | ECOR-07 | ECOR-08 | ECOR-09 | ECOR-10    | ECOR-11 | ECOR-12 |
|         |         |         |         |         |         |         |         |         |            |         |         |
| ECOR-13 | ECOR-14 | ECOR-15 | ECOR-16 | ECOR-17 | ECOR-18 | ECOR-19 | ECOR-20 | ECOR-21 | ECOR-22    | ECOR-23 | ECOR-24 |
|         |         |         |         |         |         |         |         |         |            |         |         |
| ECOR-25 | ECOR-26 | ECOR-27 | ECOR-28 | ECOR-29 | ECOR-30 | ECOR-31 | ECOR-32 | ECOR-33 | ECOR-34    | ECOR-35 | ECOR-36 |
|         |         |         |         |         |         |         |         |         |            |         |         |
| ECOR-37 | ECOR-38 | ECOR-39 | ECOR-40 | ECOR-41 | ECOR-42 | ECOR-43 | ECOR-44 | ECOR-45 | ECOR-46    | ECOR-47 | ECOR-48 |
|         |         |         |         |         |         |         |         |         |            |         |         |
| ECOR-49 | ECOR-50 | ECOR-51 | ECOR-52 | ECOR-53 | ECOR-54 | ECOR-55 | ECOR-56 | ECOR-57 | ECOR-58    | ECOR-59 | ECOR-60 |
|         |         |         |         |         |         |         |         |         |            |         |         |
| ECOR-61 | ECOR-62 | ECOR-63 | ECOR-64 | ECOR-65 | ECOR-66 | ECOR-67 | ECOR-68 | ECOR-69 | ECOR-70    | ECOR-71 | ECOR-72 |
|         |         |         |         |         |         |         |         |         |            |         |         |
| ETEC 1  | ETEC 2  | ETEC 3  | ETEC 4  | ETEC 5  | ETEC 6  | ETEC 7  | ETEC 8  | ETEC 9  | ETEC 10    | ETEC 11 | ETEC 12 |
|         |         |         |         |         |         |         |         |         |            |         |         |
| ETEC 13 | ETEC 14 | ETEC 15 | ETEC 16 | ETEC 17 | ETEC 18 | ETEC 19 | ETEC 20 | ETEC 21 | ETEC 22    | ETEC 23 | ETEC 24 |
|         |         |         |         |         |         |         |         |         |            |         |         |
| ETEC 25 | ETEC 26 | ETEC 27 | ETEC 28 | ETEC 29 | ETEC 30 | ETEC 31 | ETEC 32 | ETEC 33 | ETEC 34    | ETEC 35 | ETEC 36 |
|         |         |         |         |         |         |         |         |         |            |         |         |
| ETEC 37 | ETEC 38 | ETEC 39 | ETEC 40 | ETEC 41 | ETEC 42 | ETEC 43 | ETEC 44 | ETEC 45 | E36        | E562    | E616    |
|         |         |         |         |         |         |         |         |         |            |         |         |
| E625    | E806    | E925    | E1057   | E1167   | E1189   | E1373   | E1441   | E1533   | E1566, 155 | E1600   | E1635   |
|         |         |         |         |         |         |         |         |         |            |         |         |
| E1649   | E1679   | E1739   | E1752   | E1779   |         |         |         |         |            |         |         |
|         |         |         |         |         |         |         |         |         |            |         |         |

**Figure S2. Host range analyses on phage SU7.** Data are based on three biological replicates. Bacterial strains used for the host range analyses are ETEC and *E. coli* from the ECOR collection. ■ confluent lysis, ■ individual bacterial colonies in the spot, ■ no effect, and ■ host strain.

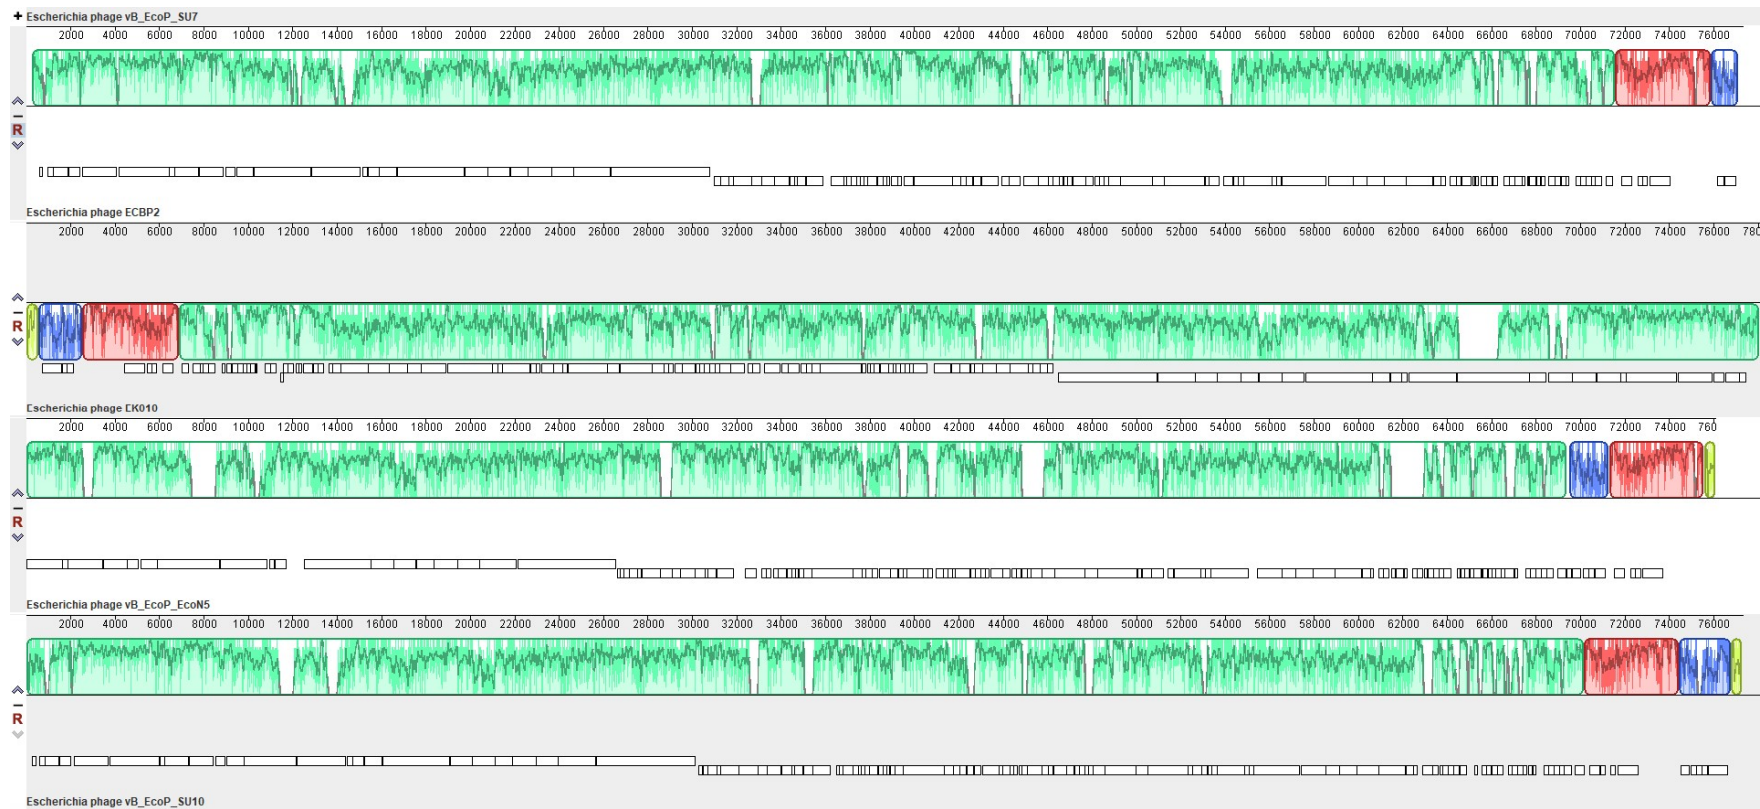

**Figure S3. Multiple genome alignment of SU7 and closely related *Kuraviruses* vB\_EcoP\_SU10, vB\_EcoP\_EcoN, ECBP2, and EK010 using MAUVE.** Bar heights represent the average level of conservation within each region of the genome sequence. White regions represent fragments that have not been aligned or have sequence specific components. Homologous regions within each genome is depicted in different colored blocks.

**Table S1. General features and functions of presumed genes from phage SU7.** Gene lengths are represented as nucleotides (nt) and the coding strand of DNA where the ORF is located as either top (T) or bottom (B) strand. Identity is the percentage of identical residues in the most similar protein found in the nr NCBI database.

| ORFs | Length (nt) | Strand | Predicted function               | Query cover | E-value   | Identity (%) | Accession      |
|------|-------------|--------|----------------------------------|-------------|-----------|--------------|----------------|
| 1    | 249         | T      | Hypothetical protein             | 98%         | 5.00E-27  | 75.00%       | BCG45043.1     |
| 2    | 654         | T      | Hypothetical protein             | 99%         | 4.00E-138 | 93.52%       | YP_006908854.1 |
| 3    | 468         | T      | Hypothetical protein             | 89%         | 6.00E-84  | 98.57%       | BCG45041.1     |
| 4    | 1542        | T      | Terminase large subunit          | 99%         | 0         | 99.42%       | BCG45040.1     |
| 5    | 2244        | T      | Portal protein                   | 99%         | 0         | 99.06%       | BCG45039.1     |
| 6    | 237         | T      | Hypothetical protein             | 98%         | 4.00E-40  | 98.72%       | BCG45038.1     |
| 7    | 1086        | T      | Scaffolding protein              | 99%         | 0         | 94.74%       | BCG45037.1     |
| 8    | 1056        | T      | Major head protein               | 99%         | 0         | 99.43%       | BCG45036.1     |
| 9    | 513         | T      | Ig like domain protein           | 99%         | 2.00E-100 | 99.41%       | QGZ13709.1     |
| 10   | 753         | T      | Hypothetical protein             | 99%         | 0         | 98.80%       | YP_009152862.1 |
| 11   | 2643        | T      | Tail fiber protein               | 99%         | 0         | 86.73%       | QKL16987.1     |
| 12   | 2148        | T      | Hypothetical protein             | 99%         | 0         | 80.19%       | QIN95689.1     |
| 13   | 219         | T      | Holin                            | 98%         | 1.00E-46  | 97.22%       | BCG45031.1     |
| 14   | 492         | T      | Lysozyme                         | 99%         | 7.00E-119 | 97.55%       | BCG45030.1     |
| 15   | 804         | T      | Hypothetical protein             | 99%         | 7.00E-168 | 91.39%       | YP_006908867.1 |
| 16   | 3021        | T      | Bacterial surface protein        | 99%         | 0         | 84.51%       | YP_001671764.1 |
| 17   | 969         | T      | Tail fiber protein               | 99%         | 0         | 90.06%       | YP_009008712.1 |
| 18   | 1032        | T      | Hypothetical protein             | 99%         | 0         | 90.09%       | AVZ45102.1     |
| 19   | 798         | T      | Catalytic lytic transglycosylase | 99%         | 0         | 94.72%       | BCG45025.1     |
| 20   | 1053        | T      | Hypothetical protein             | 99%         | 7.00E-162 | 95.71%       | BCG45024.1     |
| 21   | 969         | T      | DNA injection protein            | 82%         | 4.00E-132 | 99.62%       | BCG45023.1     |
| 22   | 1668        | T      | Hypothetical protein             | 99%         | 0         | 98.02%       | BCG45022.1     |
| 23   | 4446        | T      | Hypothetical protein             | 99%         | 0         | 99.46%       | BCG45021.1     |
| 24   | 300         | B      | Hypothetical protein             | 99%         | 2.00E-68  | 95.96%       | BCG45019.1     |
| 25   | 405         | B      | Terminase small subunit          | 98%         | 1.00E-94  | 96.99%       | BCG45018.1     |

|    |      |   |                                      |     |           |         |                |
|----|------|---|--------------------------------------|-----|-----------|---------|----------------|
| 26 | 192  | B | Hypothetical protein                 | 98% | 9.00E-41  | 100.00% | BCG45017.1     |
| 27 | 819  | B | Exonuclease                          | 99% | 0         | 97.79%  | BCG45016.1     |
| 28 | 597  | B | Hypothetical protein                 | 99% | 1.00E-124 | 85.43%  | YP_006908881.1 |
| 29 | 651  | B | Hypothetical protein                 | 99% | 5.00E-160 | 97.69%  | YP_006908882.1 |
| 30 | 225  | B | Hypothetical protein                 | 98% | 4.00E-34  | 72.97%  | YP_006908883.1 |
| 31 | 267  | B | O-spanin                             | 83% | 8.00E-40  | 82.43%  | QEG08131.1     |
| 32 | 387  | B | Putative gp51                        | 98% | 7.00E-58  | 65.35%  | BCG45011.1     |
| 33 | 342  | B | Hypothetical protein                 | 95% | 2.00E-71  | 90.83%  | YP_006908885.1 |
| 34 | 741  | B | Hypothetical protein                 | 99% | 0         | 98.78%  | BCG45009.1     |
| 35 | 108  | B | Hypothetical protein                 | 97% | 5.00E-16  | 100.00% | QIN96097.1     |
| 36 | 165  | B | Hypothetical protein                 | 98% | 5.00E-32  | 96.30%  | QBQ76467.1     |
| 37 | 504  | B | Serine/threonine protein phosphatase | 99% | 6.00E-121 | 97.60%  | YP_009152891.1 |
| 38 | 168  | B | Hypothetical protein                 | 98% | 1.00E-34  | 100.00% | YP_006908888.1 |
| 39 | 204  | B | Hypothetical protein                 | 98% | 2.00E-17  | 57.35%  | YP_006908889.1 |
| 40 | 225  | B | Hypothetical protein                 | 98% | 4.00E-48  | 95.95%  | YP_006908890.1 |
| 41 | 186  | B | Hypothetical protein                 | 75% | 5.00E-12  | 100.00% | YP_006908891.1 |
| 42 | 180  | B | Hypothetical protein                 | 98% | 2.00E-36  | 98.31%  | YP_006908892.1 |
| 43 | 180  | B | Hypothetical protein                 | 98% | 3.00E-37  | 100.00% | BCG45002.1     |
| 44 | 393  | B | Hypothetical protein                 | 99% | 4.00E-93  | 99.23%  | YP_006908894.1 |
| 45 | 243  | B | Hypothetical protein                 | 76% | 2.00E-37  | 98.39%  | BCG45000.1     |
| 46 | 168  | B | Hypothetical protein                 | 98% | 2.00E-34  | 94.55%  | BCG44999.1     |
| 47 | 135  | B | Hypothetical protein                 | 97% | 2.00E-24  | 95.45%  | BCG44998.1     |
| 48 | 312  | B | Hypothetical protein                 | 99% | 8.00E-69  | 93.20%  | YP_006908898.1 |
| 49 | 156  | B | DNA polymerase                       | 96% | 4.00E-31  | 100.00% | BCG44996.1     |
| 50 | 477  | B | Homing endonuclease                  | 82% | 1.00E-93  | 98.47%  | YP_006908900.1 |
| 51 | 1713 | B | DNA polymerase                       | 98% | 0         | 98.94%  | BCG44996.1     |
| 52 | 354  | B | Hypothetical protein                 | 99% | 7.00E-72  | 95.73%  | BCG44995.1     |
| 53 | 258  | B | Hypothetical protein                 | 98% | 8.00E-60  | 100.00% | BCG44994.1     |
| 54 | 252  | B | Hypothetical protein                 | 98% | 9.00E-55  | 98.80%  | YP_006908904.1 |

|    |      |   |                                           |     |           |         |                |
|----|------|---|-------------------------------------------|-----|-----------|---------|----------------|
| 55 | 318  | B | Hypothetical protein                      | 78% | 5.00E-50  | 96.39%  | AVP40141.1     |
| 56 | 168  | B | No significant similarity found           |     |           |         |                |
| 57 | 741  | B | Phosphate starvation-inducible protein    | 98% | 0         | 99.59%  | QPL11101.1     |
| 58 | 330  | B | NAD-dependent DNA ligase                  | 99% | 1.00E-79  | 100.00% | YP_001671807.1 |
| 59 | 234  | B | Hypothetical protein                      | 98% | 7.00E-51  | 96.10%  | AVP40144.1     |
| 60 | 648  | B | Thymidylate synthase thyX/thy1            | 99% | 5.00E-146 | 97.66%  | BCG45157.1     |
| 61 | 492  | B | Baseplate wedge subunit                   | 99% | 2.00E-96  | 90.80%  | BCG45156.1     |
| 62 | 276  | B | Thiol-disulfide isomerase and thioredoxin | 98% | 4.00E-47  | 90.11%  | BCG44983.1     |
| 63 | 177  | B | Hypothetical protein                      | 98% | 1.00E-36  | 98.28%  | YP_006908913.1 |
| 64 | 186  | B | Hypothetical protein                      | 98% | 2.00E-36  | 100.00% | YP_006908914.1 |
| 65 | 180  | B | Hypothetical protein                      | 98% | 3.00E-35  | 98.31%  | YP_009008762.1 |
| 66 | 576  | B | DNA-binding protein                       | 99% | 3.00E-140 | 99.47%  | BCG44980.1     |
| 67 | 330  | B | Hypothetical protein                      | 99% | 7.00E-78  | 100.00% | BCG44979.1     |
| 68 | 207  | B | Hypothetical protein                      | 98% | 1.00E-26  | 85.29%  | BCG44978.1     |
| 69 | 198  | B | Hypothetical protein                      | 98% | 1.00E-41  | 96.92%  | BCG44977.1     |
| 70 | 534  | B | Deoxycytidine triphosphate deaminase      | 99% | 2.00E-129 | 99.44%  | BCG44976.1     |
| 71 | 1473 | B | Hypothetical protein                      | 99% | 0         | 93.06%  | BCG44975.1     |
| 72 | 549  | B | DNA polymerase                            | 99% | 7.00E-136 | 99.45%  | BCG44974.1     |
| 73 | 1791 | B | Primase/helicase                          | 99% | 0         | 99.50%  | BCG44973.1     |
| 74 | 207  | B | Hypothetical protein                      | 98% | 3.00E-45  | 100.00% | BCG44972.1     |
| 75 | 432  | B | Gamma-glutamyl cyclotransferase           | 98% | 3.00E-101 | 97.18%  | BCG44971.1     |
| 76 | 186  | B | Hypothetical protein                      | 98% | 1.00E-37  | 96.72%  | BCG44969.1     |
| 77 | 243  | B | Hypothetical protein                      | 98% | 1.00E-52  | 98.75%  | BCG44968.1     |
| 78 | 1236 | B | ATP-grasp enzyme                          | 99% | 0         | 96.59%  | BCG44967.1     |
| 79 | 222  | B | Hypothetical protein ECBP2_0080           | 98% | 3.00E-47  | 94.52%  | YP_006908931.1 |
| 80 | 234  | B | Hypothetical protein ECBP2_0081           | 98% | 4.00E-52  | 100.00% | YP_006908932.1 |
| 81 | 2004 | B | Glutamine amidotransferase                | 99% | 0         | 99.10%  | BCG44964.1     |
| 82 | 1101 | B | Amidoligase enzyme                        | 99% | 0         | 98.63%  | BCG44963.1     |
| 83 | 627  | B | Hypothetical protein                      | 99% | 1.00E-152 | 98.56%  | BCG44962.1     |

|     |      |   |                      |     |           |         |                |
|-----|------|---|----------------------|-----|-----------|---------|----------------|
| 84  | 810  | B | Hypothetical protein | 98% | 0         | 97.75%  | BCG44961.1     |
| 85  | 471  | B | HNH endonuclease     | 92% | 7.00E-43  | 48.97%  | SPP13284.1     |
| 86  | 951  | B | Hypothetical protein | 99% | 0         | 98.42%  | BCG44960.1     |
| 87  | 1218 | B | Hypothetical protein | 99% | 0         | 92.84%  | BCG44959.1     |
| 88  | 363  | B | Hypothetical protein | 99% | 2.00E-82  | 97.50%  | BCG44958.1     |
| 89  | 249  | B | Hypothetical protein | 98% | 2.00E-51  | 91.46%  | BCG44956.1     |
| 90  | 234  | B | Hypothetical protein | 98% | 8.00E-50  | 97.40%  | BCG44955.1     |
| 91  | 414  | B | Hypothetical protein | 99% | 4.00E-97  | 97.08%  | YP_006908943.1 |
| 92  | 258  | B | Hypothetical protein | 52% | 8.00E-14  | 100.00% | BCG44952.1     |
| 93  | 264  | B | Hypothetical protein | 98% | 3.00E-60  | 100.00% | BCG44951.1     |
| 94  | 255  | B | Hypothetical protein | 71% | 2.00E-39  | 100.00% | BCG44950.1     |
| 95  | 255  | B | Hypothetical protein | 98% | 2.00E-36  | 100.00% | BCG44948.1     |
| 96  | 255  | B | Hypothetical protein | 98% | 2.00E-56  | 95.24%  | BCG44947.1     |
| 97  | 327  | B | Hypothetical protein | 99% | 3.00E-71  | 94.44%  | YP_006908951.1 |
| 98  | 141  | B | Hypothetical protein | 97% | 3.00E-23  | 89.13%  | YP_006908952.1 |
| 99  | 132  | B | NAD+ diphosphatase   | 97% | 3.00E-24  | 100.00% | YP_009152913.1 |
| 100 | 210  | B | Hypothetical protein | 98% | 1.00E-43  | 97.10%  | BCG44946.1     |
| 101 | 258  | B | Hypothetical protein | 98% | 4.00E-58  | 98.82%  | BCG44943.1     |
| 102 | 312  | B | Hypothetical protein | 79% | 1.00E-54  | 97.59%  | BCG44942.1     |
| 103 | 198  | B | Hypothetical protein | 98% | 6.00E-41  | 98.46%  | YP_006908958.1 |
| 104 | 141  | B | Hypothetical protein | 97% | 2.00E-27  | 97.83%  | YP_006908959.1 |
| 105 | 231  | B | Hypothetical protein | 98% | 1.00E-48  | 97.37%  | BCG44938.1     |
| 106 | 177  | B | Hypothetical protein | 98% | 5.00E-36  | 100.00% | BCG44937.1     |
| 107 | 306  | B | Hypothetical protein | 99% | 2.00E-66  | 98.02%  | BCG44936.1     |
| 108 | 306  | B | Hypothetical protein | 99% | 6.00E-71  | 99.01%  | BCG44935.1     |
| 109 | 444  | B | Hypothetical protein | 99% | 7.00E-105 | 98.64%  | BCG44934.1     |
| 110 | 210  | B | Hypothetical protein | 98% | 2.00E-16  | 55.07%  | QEM42684.1     |
| 111 | 222  | B | Hypothetical protein | 98% | 1.00E-47  | 100.00% | BCG44933.1     |
| 112 | 225  | B | Hypothetical protein | 81% | 1.00E-37  | 95.08%  | BCG44932.1     |

|            |     |   |                                 |     |           |        |            |
|------------|-----|---|---------------------------------|-----|-----------|--------|------------|
| <b>113</b> | 903 | B | Hypothetical protein            | 95% | 2.00E-180 | 95.83% | BCG44931.1 |
| <b>114</b> | 201 | B | No significant similarity found |     |           |        |            |
| <b>115</b> | 372 | B | Hypothetical protein            | 71% | 6.00E-41  | 66.29% | QIN95674.1 |
| <b>116</b> | 273 | B | Hypothetical protein            | 98% | 7.00E-52  | 83.33% | BCG44930.1 |
| <b>117</b> | 249 | B | Hypothetical protein            | 84% | 3.00E-33  | 94.29% | BCG44929.1 |
| <b>118</b> | 501 | B | Hypothetical protein            | 99% | 3.00E-102 | 88.55% | BCG44928.1 |
| <b>119</b> | 76  | B | tRNA <sup>Arg</sup>             |     |           |        |            |
